# Supplementary material
Source: PubMed Central journal article supplement (PMC2843195)
Supplement: supp_M109.077230_jbc.M109.077230-1.pdf [file supp_M109.077230_jbc.M109.077230-1.pdf]

**ENHANCED TRANSLATION OF HEME OXYGENASE-2 PRESERVES HUMAN  
ENDOTHELIAL CELL VIABILITY DURING HYPOXIA**

**Jeff Z. He, J.J. David Ho, Sheena Gingerich, David W. Courtman, Philip A. Marsden, and  
Michael E. Ward**

Address correspondence to: Philip A. Marsden, MD, Room 7358, Medical Sciences Building; 1 King's  
College Circle, Toronto, Ontario, Canada. M5S 1A8

Tel: (416) 978-2441; Fax: (416) 978-8765; E-mail: p.marsden@utoronto.ca

## Supplemental Figure S1

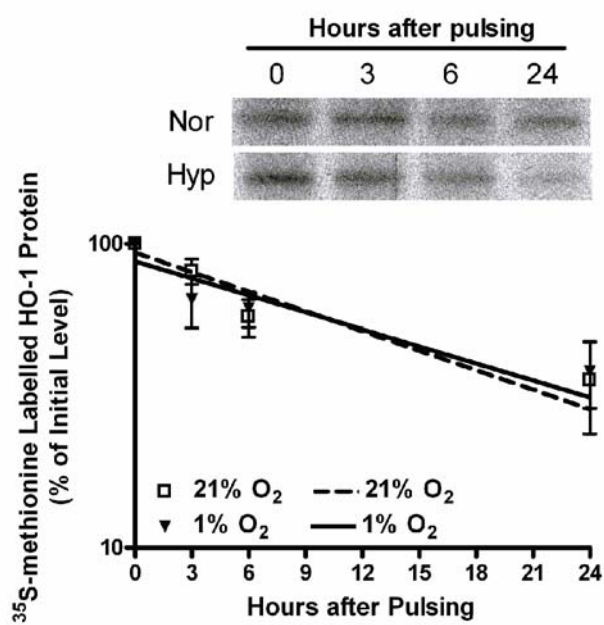

Supplemental Fig. S1. Level of radio-labelled HO-1 protein after immunoprecipitation with anti-HO-1 antibodies in HUVEC pulsed with <sup>35</sup>S-methionine for 3 h and chased in EGM-2 media under 21% or 1% oxygen for the times indicated. The result represents the average of 4 independent experiments. The protein level at 0 h was defined as 100%.

## Supplemental Figure S2

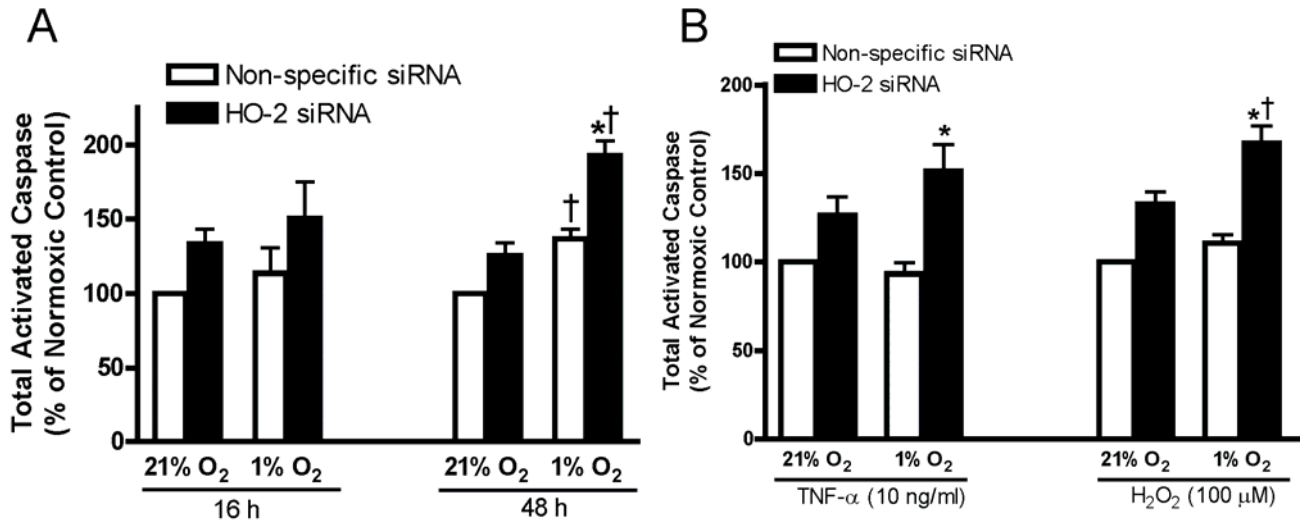

Supplemental Fig. S2. Total activated caspase level in human umbilical vein endothelial cells (HUVEC) transfected with non-specific or HO-2 siRNA exposed to 21% or 1% oxygen for 16 or 48 h (A) or exposed to 21% or 1% oxygen for 16 h and treated with TNF- $\alpha$  or H<sub>2</sub>O<sub>2</sub> (B). Bars represent means  $\pm$  S.E.M. n = 5 independent experiments, \* $P$ <0.05 for differences from non-specific siRNA controls. † $P$ <0.05 for differences from corresponding normoxic control values.

## Supplemental Figure S3

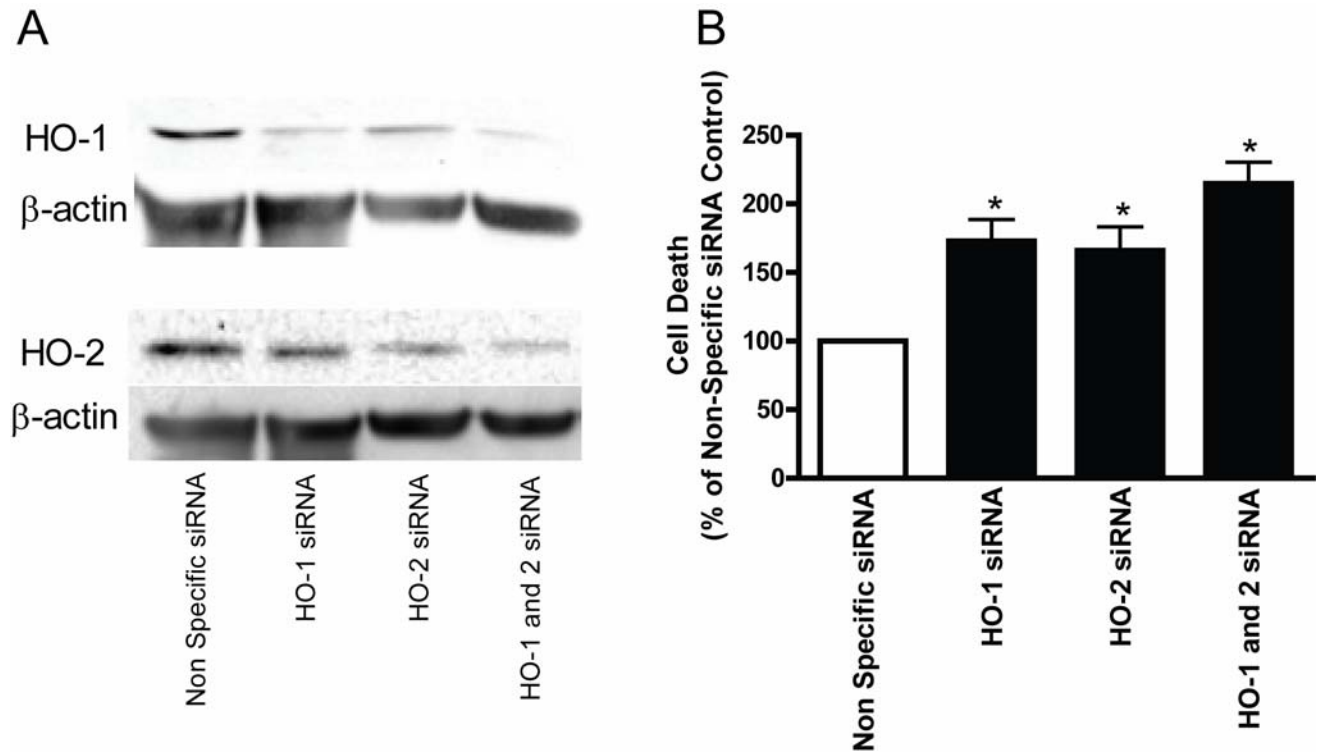

Supplemental Fig. S3. A: Representative blots of HO-1 and -2 protein in human umbilical vein endothelial cells (HUVEC) transfected with non-specific, HO-1, HO-2 or HO-1 and HO-2 siRNA. B: Cell death (% cells staining positive for Annexin V and/or propidium iodide) in HUVEC transfected with non-specific, HO-1, HO-2 or HO-1 and -2 siRNA exposed to 1% oxygen for 16 h in the presence of H<sub>2</sub>O<sub>2</sub>. Bars represent means ± S.E.M. n = 5 independent experiments, \**P*<0.05 for differences from non-specific siRNA controls.
